# Supplementary material
Source: MDPI journal article supplement (https://www.mdpi.com/2071-1050/15/10/7838)
Supplement: s1 [file s1 › sustainability-2356557-supplementary.pdf]

## Supplementary Information (SI)

**Table S1.** Specifications and maximum levels of acceptance of the compact Dry discs used in the experiment.

| Name                            | Description                                      | Specification                                                                                                         | Incubation time | Incubation temperature | Acceptable levels (log cfu/g) <sup>[1, 2]</sup> |
|---------------------------------|--------------------------------------------------|-----------------------------------------------------------------------------------------------------------------------|-----------------|------------------------|-------------------------------------------------|
| Compact Dry Total Count (TC)    | Quantification of aerobic mesophilic total count | Approved by MicroVal (certificate Nr. RQA2007LR01), NordVal (certificate Nr.033) and AOAC-RI (certificate Nr. 010404) | 48 hours        | 35 ± 2° C              | ≤4-5                                            |
| Compact Dry Yeasts & Molds (YM) | 3-dimensional growth of yeast and mold           | Approved by AOAC-RI                                                                                                   | 3 – 5 days      | 25 – 30° C             | ≤4                                              |

**Table S2.** Results of shelf-life study on tomato fruits stored at 5° C, room temperature and 45° C and a relative humidity of 80% for 1 week.

| Type of packaging | Temperature (° C) | Weight loss (%) | pH          | Appearance                                   | Compact Dry Yeasts & Molds (YM) | Compact Dry Total Count (TC) |
|-------------------|-------------------|-----------------|-------------|----------------------------------------------|---------------------------------|------------------------------|
| PF <sup>1</sup>   | 5                 | 0.16 ± 0.03     | 4.15 ± 0.12 | Red-acceptable                               | Unacceptable after 5d           | Unacceptable after 6d        |
|                   | Room Temp.        | 2.39 ± 0.08     | 4.03 ± 0.23 | Red-slightly darker than day zero            | Unacceptable after 4d           | Unacceptable after 5d        |
|                   | 45                | 18.4 ± 1.03     | 3.37 ± 0.36 | darker than day zero-shrinkage-oil secretion | Unacceptable after 3d           | Unacceptable after 3d        |
| EF <sup>2</sup>   | 5                 | 0.21 ± 0.06     | 4.23 ± 0.21 | Red-acceptable                               | Marginally acceptable after 7d  | Acceptable after 7d          |
|                   | Room Temp.        | 1.09 ± 0.18     | 4.11 ± 0.15 | Red-acceptable                               | Unacceptable after 7d           | Acceptable after 7d          |
|                   | 45                | 9.61 ± 1.31     | 3.95 ± 0.24 | darker than day zero-shrinkage-oil secretion | Unacceptable after 5d           | Unacceptable after 5d        |

|                 |            |             |             |                                              |                       |                       |
|-----------------|------------|-------------|-------------|----------------------------------------------|-----------------------|-----------------------|
| CF <sup>3</sup> | 5          | 0.31 ± 0.04 | 4.21 ± 0.08 | Red-acceptable                               | Acceptable after 7d   | Acceptable after 7d   |
|                 | Room Temp. | 1.13 ± 0.11 | 3.89 ± 0.10 | Red-acceptable                               | Unacceptable after 7d | Acceptable after 7d   |
|                 | 45         | 9.8 ± 1.65  | 3.65 ± 0.14 | darker than day zero-shrinkage-oil secretion | Unacceptable after 5d | Unacceptable after 5d |

1. PF: Plain PP film (PF)

2. EF: Film with incorporated tomato leaf-stem extract and flavomix through extrusion

3. CF: PP film coated with zein nanofibers containing the aforementioned bioactive compounds through electrospinning

**Table S3.** Life Cycle Inventory for Scenario a.

| Dataset                                                                                 | Source       | Unit | Agricultural production | Film production | Tray production | Tomato packaging | Retail | Consumption |
|-----------------------------------------------------------------------------------------|--------------|------|-------------------------|-----------------|-----------------|------------------|--------|-------------|
| Biowaste {CH}  treatment of biowaste by anaerobic digestion   Cut-off, S                | Ecoinvent v3 | g    | 201.9                   | 0.0             | 0.0             | 35.1             | 0.0    | 28.6        |
| Biowaste {CH}  treatment of biowaste, industrial composting   Cut-off, S                | Ecoinvent v3 | g    | 227.7                   | 0.0             | 0.0             | 39.6             | 0.0    | 32.2        |
| Biowaste {GLO}  treatment of biowaste, municipal incineration   Cut-off, S              | Ecoinvent v3 | g    | 17.5                    | 0.0             | 0.0             | 3.0              | 15.5   | 183.4       |
| Electricity, low voltage {Europe without Switzerland}  market group for   Cut-off, S    | Ecoinvent v3 | kJ   | 0.0                     | 0.0             | 0.0             | 0.0              | 0.0    | 22.3        |
| Electricity, medium voltage {Europe without Switzerland}  market group for   Cut-off, S | Ecoinvent v3 | kJ   | 0.0                     | 0.0             | 0.0             | 328.3            | 0.0    | 0.0         |

|                                                                                                                              |              |       |      |      |      |      |      |       |
|------------------------------------------------------------------------------------------------------------------------------|--------------|-------|------|------|------|------|------|-------|
| Municipal solid waste {CH}   treatment of, sanitary landfill   Cut-off, S                                                    | Ecoinvent v3 | g     | 8.3  | 0.0  | 0.0  | 1.4  | 14.6 | 171.6 |
| Oriented polypropylene film E                                                                                                | Industry 2.0 | g     | 0    | 6    | 0    | 0    | 0    | 0     |
| Tomato, fresh grade {ES}   tomato production, fresh grade, in unheated greenhouse   Cut-off, S                               | Ecoinvent v3 | kg    | 1.98 | 0    | 0    | 0    | 0    | 0     |
| Transport, freight, lorry 16-32 metric ton, EURO3 {RER}   transport, freight, lorry 16-32 metric ton, EURO3   Cut-off, S     | Ecoinvent v3 | kgk m | 0    | 0    | 0    | 0    | 3.1  | 0     |
| Transport, freight, lorry 16-32 metric ton, EURO4 {RER}   transport, freight, lorry 16-32 metric ton, EURO4   Cut-off, S     | Ecoinvent v3 | kgk m | 22.8 | 0.0  | 0.0  | 4.0  | 0.0  | 1.2   |
| Transport, freight, lorry 3.5-7.5 metric ton, EURO3 {RER}   transport, freight, lorry 3.5-7.5 metric ton, EURO3   Cut-off, S | Ecoinvent v3 | kgk m | 6.8  | 0.0  | 0.0  | 1.2  | 0.0  | 0.0   |
| Transport, freight, lorry 3.5-7.5 metric ton, EURO4 {RER}   transport, freight, lorry 3.5-7.5 metric ton, EURO4   Cut-off, S | Ecoinvent v3 | kgk m | 0    | 0    | 0    | 76   | 0    | 0     |
| Transport, freight, lorry 7.5-16 metric ton, EURO4 {RER}   transport, freight, lorry 7.5-16 metric ton, EURO4   Cut-off, S   | Ecoinvent v3 | kgk m | 0.00 | 0.00 | 0.00 | 0.00 | 0.00 | 72.78 |

|                                                                                                                                                                                     |              |       |      |      |      |      |      |       |
|-------------------------------------------------------------------------------------------------------------------------------------------------------------------------------------|--------------|-------|------|------|------|------|------|-------|
| Transport, freight, lorry 7.5-16 metric ton, EURO5 {RER}   transport, freight, lorry 7.5-16 metric ton, EURO5   Cut-off, S                                                          | Ecoinvent v3 | kgk m | 0    | 0    | 4.05 | 0    | 0    | 0     |
| Transport, freight, lorry with refrigeration machine, cooling {GLO}   market for   Cut-off, S                                                                                       | Ecoinvent v3 | kgk m | 0    | 0    | 0    | 0    | 222  | 0     |
| Transport, passenger car {RER}   market for   Cut-off, S                                                                                                                            | Ecoinvent v3 | m     | 0    | 0    | 0    | 0    | 0    | 87    |
| Waste paperboard {CH}   treatment of, municipal incineration   Cut-off, S                                                                                                           | Ecoinvent v3 | g     | 0.00 | 0.00 | 0.00 | 0.00 | 0.31 | 8.71  |
| Waste paperboard {CH}   treatment of, sanitary landfill   Cut-off, S                                                                                                                | Ecoinvent v3 | g     | 0.00 | 0.00 | 0.00 | 0.00 | 0.29 | 8.09  |
| Waste paperboard, sorted {Europe without Switzerland}   treatment of waste paperboard, unsorted, sorting   Cut-off, S                                                               | Ecoinvent v3 | g     | 0.00 | 0.00 | 0.00 | 0.00 | 0.00 | 9.30  |
| Waste polyethylene terephthalate, for recycling, sorted {Europe without Switzerland}   treatment of waste polyethylene terephthalate, for recycling, unsorted, sorting   Cut-off, S | Ecoinvent v3 | mg    | 0.0  | 0.0  | 0.0  | 0.0  | 0.0  | 517.6 |
| Waste polypropylene {CH}   treatment of, municipal incineration   Cut-off, S                                                                                                        | Ecoinvent v3 | g     | 0.0  | 0.0  | 0.0  | 0.0  | 0.1  | 2.9   |

|                                                                                                             |              |     |     |     |     |       |     |     |
|-------------------------------------------------------------------------------------------------------------|--------------|-----|-----|-----|-----|-------|-----|-----|
| Waste polypropylene {CH}  treatment of, sanitary landfill   Cut-off, S                                      | Ecoinvent v3 | g   | 0.0 | 0.0 | 0.0 | 0.0   | 0.0 | 2.6 |
| Wastewater, unpolluted, from residence {CH}  market for wastewater, unpolluted, from residence   Cut-off, S | Ecoinvent v3 | cm3 | 0.0 | 0.0 | 0.0 | 122.0 | 0.0 | 0.0 |
| Water, completely softened {RER}  market for water, completely softened   Cut-off, S                        | Ecoinvent v3 | g   | 0.0 | 0.0 | 0.0 | 121.6 | 0.0 | 0.0 |
| White lined chipboard carton {RER}  white lined chipboard carton production   Cut-off, S                    | Ecoinvent v3 | g   | 0   | 0   | 27  | 0     | 0   | 0   |

**Table S4.** Life Cycle Inventory for Scenario b.

| Dataset                                                                          | Source       | Unit | Agricultural production | Film production | Tray production | Tomato packaging | Retail | Consumption |
|----------------------------------------------------------------------------------|--------------|------|-------------------------|-----------------|-----------------|------------------|--------|-------------|
| Acetic acid, without water, in 98% solution state {GLO}  market for   Cut-off, S | Ecoinvent v3 | mg   | 0.0                     | 1.3             | 0.0             | 0.0              | 0.0    | 0.0         |
| Biowaste {CH}  treatment of biowaste by anaerobic digestion   Cut-off, S         | Ecoinvent v3 | g    | 173.3                   | 0.1             | 0.0             | 30.1             | 0.0    | 24.5        |
| Biowaste {CH}  treatment of biowaste, industrial composting   Cut-off, S         | Ecoinvent v3 | g    | 195.5                   | 0.1             | 0.0             | 34.0             | 0.0    | 27.7        |
| Biowaste {GLO}  treatment of biowaste, municipal incineration   Cut-off, S       | Ecoinvent v3 | g    | 15.1                    | 0.0             | 0.0             | 2.6              | 8.2    | 157.5       |

|                                                                                                                                                                 |              |      |     |       |     |       |     |       |
|-----------------------------------------------------------------------------------------------------------------------------------------------------------------|--------------|------|-----|-------|-----|-------|-----|-------|
| Electricity, low voltage {Europe without Switzerland}   market group for   Cut-off, S                                                                           | Ecoinvent v3 | kJ   | 0.0 | 0.0   | 0.0 | 0.0   | 0.0 | 22.3  |
| Electricity, medium voltage {Europe without Switzerland}   market group for   Cut-off, S                                                                        | Ecoinvent v3 | kJ   | 0.0 | 62.7  | 0.0 | 283.0 | 0.0 | 0.0   |
| Electricity, medium voltage {RER}   market group for   Cut-off, S                                                                                               | Ecoinvent v3 | kJ   | 0.0 | 3.2   | 0.0 | 0.0   | 0.0 | 0.0   |
| Ethanol, without water, in 99.7% solution state, from ethylene {RER}   market for ethanol, without water, in 99.7% solution state, from ethylene   Cut-off, S   | Ecoinvent v3 | mg   | 0.0 | 24.5  | 0.0 | 0.0   | 0.0 | 0.0   |
| Heat, central or small-scale, natural gas {Europe without Switzerland}   heat production, natural gas, at boiler atmospheric non-modulating <100kW   Cut-off, S | Ecoinvent v3 | kJ   | 0.0 | 9.2   | 0.0 | 0.0   | 0.0 | 0.0   |
| Municipal solid waste {CH}   treatment of, sanitary landfill   Cut-off, S                                                                                       | Ecoinvent v3 | g    | 7.2 | 0.0   | 0.0 | 1.2   | 7.8 | 147.3 |
| Oriented polypropylene film E                                                                                                                                   | Industry 2.0 | g    | 0.0 | 5.8   | 0.0 | 0.0   | 0.0 | 0.0   |
| Soybean oil, crude {GLO}   market for   Cut-off, S                                                                                                              | Ecoinvent v3 | mg   | 0.0 | 128.9 | 0.0 | 0.0   | 0.0 | 0.0   |
| Tomato, fresh grade {ES}   tomato production, fresh grade, in unheated greenhouse   Cut-off, S                                                                  | Ecoinvent v3 | kg   | 1.7 | 0.0   | 0.0 | 0.0   | 0.0 | 0.0   |
| Transport, freight, lorry 16-32 metric ton, EURO3 {RER}   transport, freight,                                                                                   | Ecoinvent v3 | kgkm | 0.0 | 0.0   | 0.0 | 0.0   | 1.7 | 0.0   |

|                                                                                                                                                                                                                                                                                                                                                                                                                                                                                                                                                                                                                                                                                                                                                                                                                                                                                                                                                                                                                                                                                                         |                  |      |      |     |     |      |       |      |
|---------------------------------------------------------------------------------------------------------------------------------------------------------------------------------------------------------------------------------------------------------------------------------------------------------------------------------------------------------------------------------------------------------------------------------------------------------------------------------------------------------------------------------------------------------------------------------------------------------------------------------------------------------------------------------------------------------------------------------------------------------------------------------------------------------------------------------------------------------------------------------------------------------------------------------------------------------------------------------------------------------------------------------------------------------------------------------------------------------|------------------|------|------|-----|-----|------|-------|------|
| lorry 16-32 metric ton,<br>EURO3   Cut-off, S<br>Transport, freight,<br>lorry 16-32 metric ton,<br>EURO4 {RER}  <br>transport, freight,<br>lorry 16-32 metric ton,<br>EURO4   Cut-off, S<br>Transport, freight,<br>lorry 3.5-7.5 metric<br>ton, EURO3 {RER}  <br>transport, freight,<br>lorry 3.5-7.5 metric<br>ton, EURO3   Cut-off,<br>S<br>Transport, freight,<br>lorry 3.5-7.5 metric<br>ton, EURO4 {RER}  <br>transport, freight,<br>lorry 3.5-7.5 metric<br>ton, EURO4   Cut-off,<br>S<br>Transport, freight,<br>lorry 7.5-16 metric ton,<br>EURO4 {RER}  <br>transport, freight,<br>lorry 7.5-16 metric ton,<br>EURO4   Cut-off, S<br>Transport, freight,<br>lorry 7.5-16 metric ton,<br>EURO5 {RER}  <br>transport, freight,<br>lorry 7.5-16 metric ton,<br>EURO5   Cut-off, S<br>Transport, freight,<br>lorry with<br>refrigeration machine,<br>cooling {GLO}  <br>market for   Cut-off, S<br>Transport, passenger<br>car {RER}   market for<br>  Cut-off, S<br>Waste paperboard<br>{CH}   treatment of,<br>municipal incineration<br>  Cut-off, S<br>Waste paperboard<br>{CH}   treatment of, | Ecoinve<br>nt v3 | kgkm | 19.6 | 0.0 | 0.0 | 3.4  | 0.0   | 1.0  |
| lorry 3.5-7.5 metric<br>ton, EURO3 {RER}  <br>transport, freight,<br>lorry 3.5-7.5 metric<br>ton, EURO3   Cut-off,<br>S<br>Transport, freight,<br>lorry 3.5-7.5 metric<br>ton, EURO4 {RER}  <br>transport, freight,<br>lorry 3.5-7.5 metric<br>ton, EURO4   Cut-off,<br>S<br>Transport, freight,<br>lorry 7.5-16 metric ton,<br>EURO4 {RER}  <br>transport, freight,<br>lorry 7.5-16 metric ton,<br>EURO4   Cut-off, S<br>Transport, freight,<br>lorry 7.5-16 metric ton,<br>EURO5 {RER}  <br>transport, freight,<br>lorry 7.5-16 metric ton,<br>EURO5   Cut-off, S<br>Transport, freight,<br>lorry with<br>refrigeration machine,<br>cooling {GLO}  <br>market for   Cut-off, S<br>Transport, passenger<br>car {RER}   market for<br>  Cut-off, S<br>Waste paperboard<br>{CH}   treatment of,<br>municipal incineration<br>  Cut-off, S<br>Waste paperboard<br>{CH}   treatment of,                                                                                                                                                                                                                    | Ecoinve<br>nt v3 | kgkm | 5.9  | 0.0 | 0.0 | 1.0  | 0.0   | 0.0  |
| lorry 3.5-7.5 metric<br>ton, EURO4 {RER}  <br>transport, freight,<br>lorry 3.5-7.5 metric<br>ton, EURO4   Cut-off,<br>S<br>Transport, freight,<br>lorry 7.5-16 metric ton,<br>EURO4 {RER}  <br>transport, freight,<br>lorry 7.5-16 metric ton,<br>EURO4   Cut-off, S<br>Transport, freight,<br>lorry 7.5-16 metric ton,<br>EURO5 {RER}  <br>transport, freight,<br>lorry 7.5-16 metric ton,<br>EURO5   Cut-off, S<br>Transport, freight,<br>lorry with<br>refrigeration machine,<br>cooling {GLO}  <br>market for   Cut-off, S<br>Transport, passenger<br>car {RER}   market for<br>  Cut-off, S<br>Waste paperboard<br>{CH}   treatment of,<br>municipal incineration<br>  Cut-off, S<br>Waste paperboard<br>{CH}   treatment of,                                                                                                                                                                                                                                                                                                                                                                      | Ecoinve<br>nt v3 | kgkm | 0.0  | 0.0 | 0.0 | 65.5 | 0.0   | 0.0  |
| lorry 7.5-16 metric ton,<br>EURO4 {RER}  <br>transport, freight,<br>lorry 7.5-16 metric ton,<br>EURO4   Cut-off, S<br>Transport, freight,<br>lorry 7.5-16 metric ton,<br>EURO5 {RER}  <br>transport, freight,<br>lorry 7.5-16 metric ton,<br>EURO5   Cut-off, S<br>Transport, freight,<br>lorry with<br>refrigeration machine,<br>cooling {GLO}  <br>market for   Cut-off, S<br>Transport, passenger<br>car {RER}   market for<br>  Cut-off, S<br>Waste paperboard<br>{CH}   treatment of,<br>municipal incineration<br>  Cut-off, S<br>Waste paperboard<br>{CH}   treatment of,                                                                                                                                                                                                                                                                                                                                                                                                                                                                                                                        | Ecoinve<br>nt v3 | kgkm | 0.0  | 0.2 | 0.0 | 0.0  | 0.0   | 22.6 |
| lorry 7.5-16 metric ton,<br>EURO5 {RER}  <br>transport, freight,<br>lorry 7.5-16 metric ton,<br>EURO5   Cut-off, S<br>Transport, freight,<br>lorry with<br>refrigeration machine,<br>cooling {GLO}  <br>market for   Cut-off, S<br>Transport, passenger<br>car {RER}   market for<br>  Cut-off, S<br>Waste paperboard<br>{CH}   treatment of,<br>municipal incineration<br>  Cut-off, S<br>Waste paperboard<br>{CH}   treatment of,                                                                                                                                                                                                                                                                                                                                                                                                                                                                                                                                                                                                                                                                     | Ecoinve<br>nt v3 | kgkm | 0.0  | 0.0 | 3.5 | 0.0  | 0.0   | 0.0  |
| lorry with<br>refrigeration machine,<br>cooling {GLO}  <br>market for   Cut-off, S<br>Transport, passenger<br>car {RER}   market for<br>  Cut-off, S<br>Waste paperboard<br>{CH}   treatment of,<br>municipal incineration<br>  Cut-off, S<br>Waste paperboard<br>{CH}   treatment of,                                                                                                                                                                                                                                                                                                                                                                                                                                                                                                                                                                                                                                                                                                                                                                                                                  | Ecoinve<br>nt v3 | kgkm | 0.0  | 0.0 | 0.0 | 0.0  | 190.5 | 0.0  |
| Transport, passenger<br>car {RER}   market for<br>  Cut-off, S<br>Waste paperboard<br>{CH}   treatment of,<br>municipal incineration<br>  Cut-off, S<br>Waste paperboard<br>{CH}   treatment of,                                                                                                                                                                                                                                                                                                                                                                                                                                                                                                                                                                                                                                                                                                                                                                                                                                                                                                        | Ecoinve<br>nt v3 | m    | 0.0  | 0.0 | 0.0 | 0.0  | 0.0   | 75.0 |
| Waste paperboard<br>{CH}   treatment of,<br>municipal incineration<br>  Cut-off, S<br>Waste paperboard<br>{CH}   treatment of,                                                                                                                                                                                                                                                                                                                                                                                                                                                                                                                                                                                                                                                                                                                                                                                                                                                                                                                                                                          | Ecoinve<br>nt v3 | g    | 0.0  | 0.0 | 0.0 | 0.0  | 0.2   | 7.7  |
| Waste paperboard<br>{CH}   treatment of,                                                                                                                                                                                                                                                                                                                                                                                                                                                                                                                                                                                                                                                                                                                                                                                                                                                                                                                                                                                                                                                                | Ecoinve<br>nt v3 | g    | 0.0  | 0.0 | 0.0 | 0.0  | 0.1   | 7.2  |

|                                                                                                              |              |     |     |     |      |       |     |       |  |
|--------------------------------------------------------------------------------------------------------------|--------------|-----|-----|-----|------|-------|-----|-------|--|
| sanitary landfill   Cut-off, S                                                                               |              |     |     |     |      |       |     |       |  |
| Waste paperboard, sorted {Europe without Switzerland}   treatment of waste                                   | Ecoinvent v3 | g   | 0.0 | 0.0 | 0.0  | 0.0   | 0.0 | 8.2   |  |
| paperboard, unsorted, sorting   Cut-off, S                                                                   |              |     |     |     |      |       |     |       |  |
| Waste polyethylene terephthalate, for recycling, sorted {Europe without Switzerland}   treatment of waste    | Ecoinvent v3 | mg  | 0.0 | 0.0 | 0.0  | 0.0   | 0.0 | 517.6 |  |
| polyethylene terephthalate, for recycling, unsorted, sorting   Cut-off, S                                    |              |     |     |     |      |       |     |       |  |
| Waste polypropylene {CH}   treatment of, municipal incineration   Cut-off, S                                 | Ecoinvent v3 | g   | 0.0 | 0.0 | 0.0  | 0.0   | 0.1 | 2.9   |  |
| Waste polypropylene {CH}   treatment of, sanitary landfill   Cut-off, S                                      | Ecoinvent v3 | g   | 0.0 | 0.0 | 0.0  | 0.0   | 0.0 | 2.6   |  |
| Wastewater, unpolluted, from residence {CH}   market for wastewater, unpolluted, from residence   Cut-off, S | Ecoinvent v3 | cm3 | 0.0 | 0.0 | 0.0  | 122.0 | 0.0 | 0.0   |  |
| Water, completely softened {RER}   market for water, completely softened   Cut-off, S                        | Ecoinvent v3 | g   | 0.0 | 0.0 | 0.0  | 104.8 | 0.0 | 0.0   |  |
| White lined chipboard carton {RER}   white lined chipboard carton production   Cut-off, S                    | Ecoinvent v3 | g   | 0.0 | 0.0 | 23.0 | 0.0   | 0.0 | 0.0   |  |

---

**Table S5.** Life Cycle Inventory for Scenario c.

| Dataset                                                                                                                                                      | Source       | Unit | Agricultural<br>production | Film production | Tray production | Tomato<br>packaging | Retail | Consumption |
|--------------------------------------------------------------------------------------------------------------------------------------------------------------|--------------|------|----------------------------|-----------------|-----------------|---------------------|--------|-------------|
| Acetic acid, without water, in 98% solution state {GLO}  market for   Cut-off, S                                                                             | Ecoinvent v3 | mg   | 0.0                        | 1.2             | 0.0             | 0.0                 | 0.0    | 0.0         |
| Biowaste {CH}  treatment of biowaste by anaerobic digestion   Cut-off, S                                                                                     | Ecoinvent v3 | g    | 173.3                      | 0.1             | 0.0             | 30.1                | 0.0    | 24.5        |
| Biowaste {CH}  treatment of biowaste, industrial composting   Cut-off, S                                                                                     | Ecoinvent v3 | g    | 195.5                      | 0.1             | 0.0             | 34.0                | 0.0    | 27.7        |
| Biowaste {GLO}  treatment of biowaste, municipal incineration   Cut-off, S                                                                                   | Ecoinvent v3 | g    | 15.1                       | 0.0             | 0.0             | 2.6                 | 8.2    | 157.5       |
| Electricity, low voltage {Europe without Switzerland}  market group for   Cut-off, S                                                                         | Ecoinvent v3 | kJ   | 0.0                        | 0.0             | 0.0             | 0.0                 | 0.0    | 22.3        |
| Electricity, medium voltage {Europe without Switzerland}  market group for   Cut-off, S                                                                      | Ecoinvent v3 | kJ   | 0.0                        | 41.4            | 0.0             | 283.0               | 0.0    | 0.0         |
| Electricity, medium voltage {RER}  market group for   Cut-off, S                                                                                             | Ecoinvent v3 | kJ   | 0.0                        | 3.0             | 0.0             | 0.0                 | 0.0    | 0.0         |
| Ethanol, without water, in 99.7% solution state, from ethylene {RER}  market for ethanol, without water, in 99.7% solution state, from ethylene   Cut-off, S | Ecoinvent v3 | mg   | 0.0                        | 23.1            | 0.0             | 0.0                 | 0.0    | 0.0         |
| Heat, central or small-scale, natural gas {Europe without Switzerland}  heat                                                                                 | Ecoinvent v3 | kJ   | 0.0                        | 8.7             | 0.0             | 0.0                 | 0.0    | 0.0         |

|                                                                                                                                             |                  |          |      |       |     |      |     |       |
|---------------------------------------------------------------------------------------------------------------------------------------------|------------------|----------|------|-------|-----|------|-----|-------|
| production, natural<br>gas, at boiler<br>atmospheric non-<br>modulating <100kW  <br>Cut-off, S                                              |                  |          |      |       |     |      |     |       |
| Maize starch {GLO}  <br>market for   Cut-off, S                                                                                             | Ecoinve<br>nt v3 | mg       | 0.0  | 605.9 | 0.0 | 0.0  | 0.0 | 0.0   |
| Municipal solid waste<br>{CH}   treatment of,<br>sanitary landfill   Cut-<br>off, S                                                         | Ecoinve<br>nt v3 | g        | 7.2  | 0.0   | 0.0 | 1.2  | 7.8 | 147.3 |
| Oriented<br>polypropylene film E                                                                                                            | Industry<br>2.0  | g        | 0.0  | 5.3   | 0.0 | 0.0  | 0.0 | 0.0   |
| Tomato, fresh grade<br>{ES}   tomato<br>production, fresh<br>grade, in unheated<br>greenhouse   Cut-off,<br>S                               | Ecoinve<br>nt v3 | kg       | 1.7  | 0.0   | 0.0 | 0.0  | 0.0 | 0.0   |
| Transport, freight,<br>lorry 16-32 metric ton,<br>EURO3 {RER}  <br>transport, freight, lorry<br>16-32 metric ton,<br>EURO3   Cut-off, S     | Ecoinve<br>nt v3 | kgk<br>m | 0.0  | 0.0   | 0.0 | 0.0  | 1.7 | 0.0   |
| Transport, freight,<br>lorry 16-32 metric ton,<br>EURO4 {RER}  <br>transport, freight, lorry<br>16-32 metric ton,<br>EURO4   Cut-off, S     | Ecoinve<br>nt v3 | kgk<br>m | 19.6 | 0.0   | 0.0 | 3.4  | 0.0 | 1.0   |
| Transport, freight,<br>lorry 3.5-7.5 metric ton,<br>EURO3 {RER}  <br>transport, freight, lorry<br>3.5-7.5 metric ton,<br>EURO3   Cut-off, S | Ecoinve<br>nt v3 | kgk<br>m | 5.9  | 0.0   | 0.0 | 1.0  | 0.0 | 0.0   |
| Transport, freight,<br>lorry 3.5-7.5 metric ton,<br>EURO4 {RER}  <br>transport, freight, lorry<br>3.5-7.5 metric ton,<br>EURO4   Cut-off, S | Ecoinve<br>nt v3 | kgk<br>m | 0.0  | 0.0   | 0.0 | 65.5 | 0.0 | 0.0   |
| Transport, freight,<br>lorry 7.5-16 metric ton,<br>EURO4 {RER}  <br>transport, freight, lorry<br>7.5-16 metric ton,<br>EURO4   Cut-off, S   | Ecoinve<br>nt v3 | kgk<br>m | 0.0  | 0.1   | 0.0 | 0.0  | 0.0 | 22.6  |

|                                                                                                                                                                                                                |                  |          |     |     |     |       |       |       |
|----------------------------------------------------------------------------------------------------------------------------------------------------------------------------------------------------------------|------------------|----------|-----|-----|-----|-------|-------|-------|
| Transport, freight,<br>lorry 7.5-16 metric ton,<br>EURO5 {RER}  <br>transport, freight, lorry<br>7.5-16 metric ton,<br>EURO5   Cut-off, S                                                                      | Ecoinve<br>nt v3 | kgk<br>m | 0.0 | 0.0 | 3.5 | 0.0   | 0.0   | 0.0   |
| Transport, freight,<br>lorry with refrigeration<br>machine, cooling<br>{GLO}   market for  <br>Cut-off, S                                                                                                      | Ecoinve<br>nt v3 | kgk<br>m | 0.0 | 0.0 | 0.0 | 0.0   | 190.5 | 0.0   |
| Transport, passenger<br>car {RER}   market for<br>  Cut-off, S                                                                                                                                                 | Ecoinve<br>nt v3 | m        | 0.0 | 0.0 | 0.0 | 0.0   | 0.0   | 75.0  |
| Waste paperboard<br>{CH}   treatment of,<br>municipal incineration<br>  Cut-off, S                                                                                                                             | Ecoinve<br>nt v3 | g        | 0.0 | 0.0 | 0.0 | 0.0   | 0.2   | 7.7   |
| Waste paperboard<br>{CH}   treatment of,<br>sanitary landfill   Cut-<br>off, S                                                                                                                                 | Ecoinve<br>nt v3 | g        | 0.0 | 0.0 | 0.0 | 0.0   | 0.1   | 7.2   |
| Waste paperboard,<br>sorted {Europe<br>without Switzerland}  <br>treatment of waste<br>paperboard, unsorted,<br>sorting   Cut-off, S                                                                           | Ecoinve<br>nt v3 | g        | 0.0 | 0.0 | 0.0 | 0.0   | 0.0   | 8.2   |
| Waste polyethylene<br>terephthalate, for<br>recycling, sorted<br>{Europe without<br>Switzerland}  <br>treatment of waste<br>polyethylene<br>terephthalate, for<br>recycling, unsorted,<br>sorting   Cut-off, S | Ecoinve<br>nt v3 | mg       | 0.0 | 0.0 | 0.0 | 0.0   | 0.0   | 517.6 |
| Waste polypropylene<br>{CH}   treatment of,<br>municipal incineration<br>  Cut-off, S                                                                                                                          | Ecoinve<br>nt v3 | g        | 0.0 | 0.0 | 0.0 | 0.0   | 0.1   | 2.9   |
| Waste polypropylene<br>{CH}   treatment of,<br>sanitary landfill   Cut-<br>off, S                                                                                                                              | Ecoinve<br>nt v3 | g        | 0.0 | 0.0 | 0.0 | 0.0   | 0.0   | 2.6   |
| Wastewater,<br>unpolluted, from<br>residence {CH}                                                                                                                                                              | Ecoinve<br>nt v3 | cm3      | 0.0 | 0.0 | 0.0 | 122.0 | 0.0   | 0.0   |

|                                                                      |         |   |     |     |      |       |     |     |
|----------------------------------------------------------------------|---------|---|-----|-----|------|-------|-----|-----|
| market for wastewater,<br>unpolluted, from<br>residence   Cut-off, S |         |   |     |     |      |       |     |     |
| Water, completely<br>softened {RER}                                  | Ecoinve |   |     |     |      |       |     |     |
| market for water,<br>completely softened                             | nt v3   | g | 0.0 | 0.0 | 0.0  | 104.8 | 0.0 | 0.0 |
| Cut-off, S                                                           |         |   |     |     |      |       |     |     |
| White lined chipboard<br>carton {RER}   white                        | Ecoinve |   |     |     |      |       |     |     |
| lined chipboard carton                                               | nt v3   | g | 0.0 | 0.0 | 23.0 | 0.0   | 0.0 | 0.0 |
| production   Cut-off, S                                              |         |   |     |     |      |       |     |     |

---
